# Supplementary material for: Intimate Partner Violence and Its Association With HIV&nbsp;Testing Among Filipino Women: Results From the 2017 Philippine National Demographic and Health Survey
Source: Research Square preprint supplement (doi:10.21203/rs.3.rs-343780/v1), 2021-03-23
Supplement: Supplementary file 1 [file c5287784d8c87c3da3de724e.docx]

Supplementary File 1. Cross-tabulations with emotional violence

|  | **Has not experienced said violence** | **Experienced violence but did not confide** | **Experienced violence but confided** | **Missing** | **p-value** |
| --- | --- | --- | --- | --- | --- |
| Outcome |  |  |  |  |  |
| Never been tested for HIV | 9,955  (50.73) | 2,409  (11.27) | 367  (1.74) | 4,643  (36.26) | 0.97 |
| Having tested for HIV | 357  (62.07) | 108  (13.22) | 19  (2.06) | 110  (22.65) |
| Physical Violence |  |  |  |  |  |
| Has not experienced said violence | 9,900  (85.47) | 1,716  (13.58) | 113  (0.95) | 0  (0.00) | < 0.01 |
| Experienced violence but did not confide | 321  (31.53) | 801  (68.47) | 0  (0.00) | 0  (0.00) |
| Experienced violence but confided | 91  (34.35) | 0  (0.00) | 273  (65.65) | 0  (0.00) |
| Missing | 0  (0.00) | 0  (0.00) | 0  (0.00) | 4,753  (100) |  |
| Sexual Violence |  |  |  |  |  |
| Has not experienced said violence | 10,200  (82.23) | 2,137  (15.57) | 287  (2.19) | 0  (0.00) | < 0.01 |
| Experienced violence but did not confide | 104  (18.11) | 380  (81.89) | 0  (0.00) | 0  (0.00) |
| Experienced violence but confided | 8  (8.61) | 0  (0.00) | 99  (91.39) | 0  (0.00) |
| Missing | 0  (0.00) | 0  (0.00) | 0  (0.00) | 4,753  (100) |  |
| Any Violence |  |  |  |  |  |
| Has not experienced said violence | 9,826  (100) | 0  (0.00) | 0  (0.00) | 0  (0.00) | < 0.01 |
| Experienced violence but did not confide | 391  (14.43) | 2,517  (85.57) | 0  (0.00) | 0  (0.00) |
| Experienced violence but confided | 95  (27.05) | 0  (0.00) | 386  (72.95) | 0  (0.00) |
| Missing | 0  (0.00) | 0  (0.00) | 0  (0.00) | 4,753  (100) |  |
| Hurting Partner |  |  |  |  |  |
| No | 9,532  (83.46) | 1,838  (14.44) | 257  (2.10) | 0  (0.00) | < 0.01 |
| Yes | 780  (51.69) | 679  (41.06) | 129  (7.25) | 0  (0.00) |
| Missing | 0  (0.00) | 0  (0.00) | 0  (0.00) | 4,753  (100) |  |
| Alcohol intake of partner |  |  |  |  |  |
| No | 4,554  (88.40) | 534  (10.89) | 44  (0.72) | 0  (0.00) | < 0.01 |
| Yes | 5,758  (74.81) | 1,983  (21.36) | 342  (3.82) | 0  (0.00) |
| Missing | 0  (0.00) | 0  (0.00) | 0  (0.00) | 4,753  (100) |  |
| Respondent’s father beats mother |  |  |  |  |  |
| No | 8,502  (52.59) | 1,734  (9.76) | 231  (1.38) | 3,900  (36.28) | < 0.01 |
| Yes | 1,629  (46.33) | 696  (17.51) | 144  (2.85) | 741  (33.31) |
| Missing | 181  (42.66) | 87  (17.54) | 11  (6.07) | 112  (33.73) |  |
| Educational attainment of respondent |  |  |  |  |  |
| No education | 178  (63.88) | 23  (10.33) | 5  (2.20) | 25  (23.59) | < 0.01 |
| Primary education | 2,044  (67.25) | 562  (17.29) | 94  (2.97) | 302  (12.49) |
| Secondary education | 4,748  (48.49) | 1,309  (12.63) | 204  (1.90) | 2,478  (36.98) |
| Higher | 3,342  (49.00) | 623  (7.50) | 83  (1.11) | 1,947  (42.40) |
| Missing | 0  (0.00) | 0  (0.00) | 0  (0.00) | 1  (100) |  |
| Educational attainment of partner |  |  |  |  |  |
| No education | 190  (78.01) | 37  (21.38) | 2  (0.62) | 0  (0.00) | < 0.01 |
| Primary education | 2,772  (76.66) | 717  (19.92) | 121  (3.42) | 0  (0.00) |
| Secondary education | 4,084  (80.86) | 951  (16.43) | 148  (2.71) | 0  (0.00) |
| Higher | 2,893  (86.10) | 536  (12.49) | 62  (1.41) | 0  (0.00) |
| Missing | 373  (5.94) | 276  (4.25) | 53  (0.71) | 4,753  (89.09) |  |
| Domicile |  |  |  |  |  |
| Urban | 3,426  (48.17) | 793  (9.94) | 117  (1.47) | 1,895 (40.42) | 0.24 |
| Rural | 6.886  (54.17) | 1,724  (12.72) | 269  (2.02) | 2,858  (31.09) |
| Religion |  |  |  |  |  |
| Roman Catholic | 7,344  (51.00) | 1,892  (11.33) | 298  (1.77) | 3,490  (35.90) | < 0.01 |
| Protestant | 989  (50.59) | 254  (14.10) | 37  (2.11) | 434  (33.20) |
| Iglesia ni Cristo | 302  (54.56) | 76  (9.85) | 10  (1.17) | 132  (34.42) |
| Aglipay | 137  (57.45) | 39  (10.35) | 6  (1.53) | 68  (30.67) |
| Islam | 1,034  (53.96) | 106  (7.44) | 6  (0.35) | 430  (38.24) |
| Other Christian | 292  (46.79) | 91  (10.61) | 21  (3.18) | 145  (39.42) |
| Other/None | 214  (54.24) | 59  (16.71) | 8  (2.75) | 54  (26.30) |
| Access to newspaper or magazine |  |  |  |  |  |
| Not at all | 5,673  (56.48) | 1,316  (12.01) | 203  (2.08) | 1,983  (29.43) | 0.58 |
| Less than once a week | 3,507  (48.85) | 932  (11.00) | 148  (1.57) | 1,922  (38.57) |
| At least once a week | 1,132  (41.38) | 269  (10.24) | 35  (1.21) | 848  (47.17) |
| Access to radio |  |  |  |  |  |
| Not at all | 3,287  (55.62) | 697  (11.62) | 96  (1.88) | 1,278  (30.88) | 0.06 |
| Less than once a week | 3,622  (50.71) | 843  (10.24) | 138  (1.54) | 1,838  (37.51) |
| At least once a week | 3,403  (48.59) | 977  (12.37) | 152  (1.89) | 1,637  (37.16) |
| Access to television |  |  |  |  |  |
| Not at all | 1,111  (60.23) | 180  (10.29) | 23  (1.03) | 344  (28.45) | 0.03 |
| Less than once a week | 1,943  (50.17) | 486  (10.08) | 78  (1.73) | 882  (38.01) |
| At least once a week | 7,258  (50.77) | 1,851  (11.72) | 285  (1.81) | 3,527  (35.70) |
| Access to internet |  |  |  |  |  |
| Not at all | 5,484  (68.61) | 1,370  (16.71) | 207  (2.47) | 799  (12.21) | 0.12 |
| Less than once a week | 1,114  (56.69) | 282  (12.38) | 31  (1.74) | 461  (29.19) |
| At least once a week | 1,744  (44.93) | 409  (9.14) | 79  (1.98) | 1,316  (43.95) |
| Almost every day | 1,970  (37.14) | 456  (7.36) | 69  (0.95) | 2,177  (54.56) |
| Wealth index |  |  |  |  |  |
| Poorest | 2,960  (57.43) | 768  (15.51) | 120  (2.44) | 809  (24.62) | < 0.01 |
| Poorer | 2,295  (51.72) | 679  (15.26) | 108  (2.52) | 946  (30.50) |
| Middle | 1,947  (51.70) | 490  (12.44) | 70  (2.10) | 961  (33.77) |
| Richer | 1,747  (51.68) | 333  (8.43) | 59  (1.35) | 991  (38.54) |
| Richest | 1,363  (45.41) | 247  (7.03) | 29  (0.72) | 1,046  (46.84) |
| Work (Employment status) |  |  |  |  |  |
| No | 5,071  (47.04) | 1,179  (9.92) | 176  (1.38) | 3,081  (41.66) | 0.11 |
| Yes | 5,241  (56.08) | 1,338  (13.02) | 210  (2.18) | 1,672  (28.72) |
| Marital Status |  |  |  |  |  |
| Never married | 0 (0.0) | 0 (0.0) | 0 (0.0) | 4,753 (100.0) | <0.01 |
| Married | 7,531 (82.68) | 1,536 (15.27) | 206 (2.05) | 0 (0.0) |
| Living with partner | 2,412 (78.51) | 707 (18.07) | 128 (3.41) | 0 (0.0) |
| Separated/widowed/divorced | 369 (54.36) | 274 (39.13) | 52 (6.51) | 0 (0.0) |
| Consistent condom use |  |  |  |  |  |
| Did not use condoms during most recent sexual encounter | 9,354  (78.10) | 2,135  (15.74) | 328  (2.49) | 270  (3.66) | 0.10 |
| Inconsistent condom use | 40  (69.46) | 13  (25.48) | 0  (0.00) | 3  (5.07) |
| Consistent condom use | 135  (62.58) | 38  (19.51) | 0  (0.00) | 28  (17.91) |
| Missing | 783  (11.33) | 331  (4.61) | 58  (0.72) | 4,452  (83.34) |  |
| Tobacco use |  |  |  |  |  |
| No | 9.827  (51.20) | 2,341  (11.20) | 350  (1.64) | 4,596  (35.96) | < 0.01 |
| Yes | 485  (51.54) | 176  (14.02) | 36  (3.76) | 157  (30.69) |
| Alcohol consumption |  |  |  |  |  |
| No | 8,052  (51.91) | 1,627  (10.16) | 206  (1.38) | 3,636  (36.55) | < 0.01 |
| Yes | 2,260  (49.26) | 890  (14.73) | 180  (2.82) | 1,117  (33.18) |
| Age of respondent |  |  |  |  | 0.13* |
| Household size |  |  |  |  | 0.22* |
| Age at first sexual intercourse |  |  |  |  | <0.01* |
| Age of partner |  |  |  |  | 0.31* |
| Number of lifetime sexual partners |  |  |  |  | <0.01* |
| Number of children |  |  |  |  | <0.01* |
| HIV knowledge score |  |  |  |  | <0.01* |
| Tolerance to domestic violence score |  |  |  |  | <0.01* |
| Women’s empowerment score |  |  |  |  | <0.01* |
| Perceived controlling behavior of husband score |  |  |  |  | <0.01* |

* Kruskal-Wallis equality of populations rank test
